# Supplementary material for: Obstacle-enhanced spontaneous oscillation of confined active granules
Source: Royal Society of Chemistry journal article supplement (doi:10.1039/d4sm01027b), 2024-11-01
Supplement: d4sm01027b3.pdf [file d4sm01027b3.pdf]

## Supplementary material for “Obstacle-enhanced spontaneous oscillation of confined active granules”

Xue Zhang,<sup>1</sup> Yuxin Tian,<sup>1</sup> Ran Ni,<sup>2</sup> Yong Zhu,<sup>3</sup> Luhui Ning,<sup>4, 5, \*</sup> Peng Liu,<sup>1, †</sup>  
Mingcheng Yang,<sup>6, 7, 8, ‡</sup> and Ning Zheng<sup>1, §</sup>

1 School of Physics, Beijing Institute of Technology, Beijing 100081, China

2 School of Chemistry, Chemical Engineering and Biotechnology, Nanyang Technological University, 62 Nanyang Drive, 637459, Singapore

3 Science and Technology on Electromagnetic Scattering Laboratory, Beijing 100854, China

4 Beijing Key Laboratory of Optical Detection Technology for Oil and Gas, China University of Petroleum-Beijing, Beijing 102249, China

5 Basic Research Center for Energy Interdisciplinary, College of Science, China University of Petroleum-Beijing, Beijing 102249, China

6 Beijing National Laboratory for Condensed Matter Physics and Laboratory of Soft Matter Physics, Institute of Physics, Chinese Academy of Sciences, Beijing 100190, China

7 School of Physical Sciences, University of Chinese Academy of Sciences, Beijing 100049, China

8 Songshan Lake Materials Laboratory, Dongguan, Guangdong 523808, China

## 1. Mean squared displacement (MSD) of an active granular particle

To visualize the self-propelling character of the active dumbbell-shaped particle, Fig. S1 shows the MSD of the granular dumbbell along its long axis as a function of time, which is equivalent to a one-dimensional motion. The parabolic time dependence of the MSD indicates that the granular dumbbell experiences a self-propulsion along its long axis.

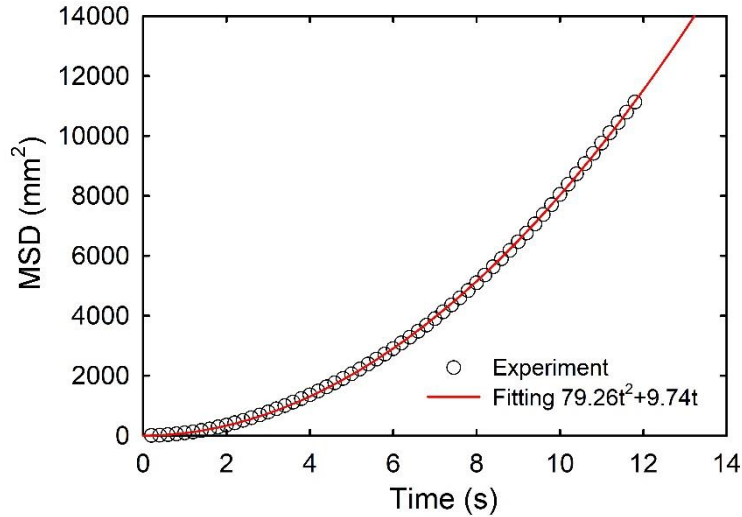

**Fig. S1.** MSD of an isolated granular dumbbell along its long axis. Here, the vibrating frequency  $f = 80\text{Hz}$  and dimensionless acceleration  $\Gamma = 4g$ . The solid line refers to a fitting with a quadratic function.

## 2. Videos

Movie S1. Self-propelled particles confined in two chambers **without** obstacles inside generate spontaneous number oscillation with unsatisfactory periodicity. The parameters in this oscillation: vibrating frequency  $f = 80\text{Hz}$  and vibrating strength  $\Gamma = 4g$ , channel length  $L = 12$  in unit of one self-propelled particle, channel width  $w = 1.25$ , where the channel width  $w$  is normalized by the diameter  $d_b$  of the large ball on the self-propelled particle, and the total particle number  $N = 80$ .

Movie S2. Self-propelled particles confined in two chambers **with** obstacles inside generate spontaneous number oscillation with satisfactory periodicity. In the control experiment, all other conditions maintain the same.

## 3. The orientation distribution of particles near the channel opening with and without obstacles

We discuss the orientation distribution of particles near the channel opening with and without obstacles. First, we draw a semicircle centered around the midpoint of the

opening, with a radius equal to the distance from the top of the obstacle to the opening, as shown by the yellow semicircle in Fig. S2(a) and Fig. S2(b). The purple arrow is parallel to the channel and points towards the opening. We then record the angle between the long axis direction of each particle (i.e. the direction of self-propulsion, indicated by the red arrow) within this semicircle, and the purple arrow. We perform 200 statistical measurements under both conditions, with and without obstacles, to obtain the probability distribution of  $\Delta\theta$ , as shown in Fig. S3. It can be seen that the peak of the probability distribution curve shifts to the left after adding the obstacle, and the probability of angles greater than  $90^\circ$  is almost zero. This also confirms the rectification effect of obstacles on the movement direction of particles near the opening.

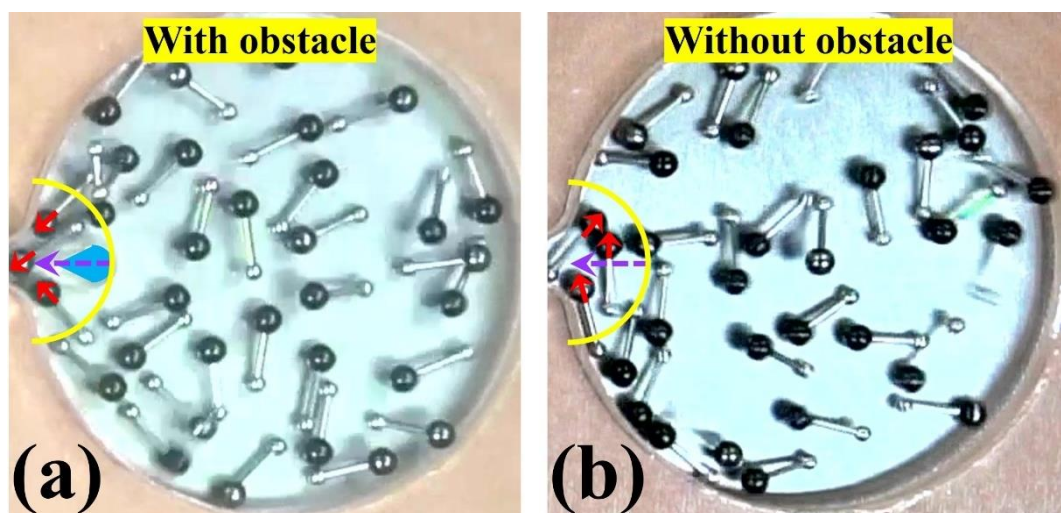

**Fig. S2.** Orientation of particles near the opening (indicated by a yellow semi-circle) (a) with the obstacle. (b) Without the obstacle.

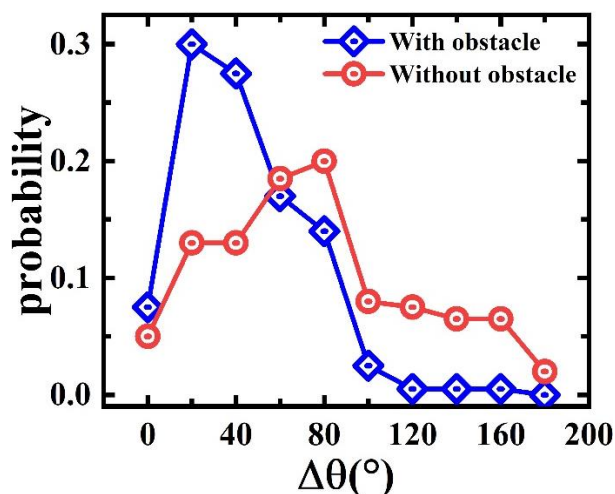

**Fig. S3.** Distribution of orientation angles between particles near the opening under conditions with and without obstacles.
